# Supplementary material
Source: PubMed Central journal article supplement (PMC10535368)

## Evaluation of Risk-Adjusted 30-day Home-Time after Transcatheter Aortic Valve Replacement as a Hospital-level Quality Metric

Amgad Mentias, MD, MS; Neil Keshvani, MD; Dharam Kumbhani, MD, SM, Mary Vaughan Sarrazin, PhD; Yubo Gao, PhD; Samir Kapadia, MD;<sup>1</sup> Milind Desai, MD; Eric Peterson, MD; Michael Mack, MD; Saket Girotra, MD, SM; Ambarish Pandey MD, MSCS

### Supplemental File contents:

**Supplemental Table 1:** Candidate variables considered and tested for each risk adjustment model for the outcomes of 30-day home time, 30-day mortality and 30-day readmission

**Supplemental Table 2:** Final variables included in the risk adjustment model for 30-day home time in the whole study cohort.

**Supplemental Table 3:** Final variables included in the risk adjustment model for 30-day mortality in the whole study cohort.

**Supplemental Table 4:** Final variables included in the risk adjustment model for 30-day readmission in the whole study cohort.

**Supplemental Table 5:** Performance of the risk adjustment models for different hospital-level performance metrics for Transcatheter aortic valve replacement hospitalization in the development and validation cohort

**Supplemental Table 6:** Hospital characteristics in sensitivity analysis, classified by quartiles of unadjusted 30-day home time.

**Supplemental Figure 1:** Flow chart of study cohort: Flow chart for derivation of final study cohort.

**Supplemental Figure 2:** Histogram of TAVR annual volume: Frequency distribution of average annual TAVR procedure volume for TAVR centers included in the study

**Supplemental Figure 3:** Correlation between hospital TAVR volume and other hospital quality metrics. Correlation between TAVR center annual volume and a) 30-day RSMR, b) 30-day RSRR.

**Supplemental Figure 4:** Correlation between 30-day home time and admissions over one year. Correlation between hospital risk adjusted 30-day home time and rate of admissions per patient-month time for 1 year.

**Supplemental Table 1:** Candidate variables considered and tested for each risk adjustment model for the outcomes of 30-day home time, 30-day mortality and 30-day readmission. These variables included patient age, sex, race, chronic conditions (CC) defined by mapping international classification of diseases (ICD) codes 9 and 10 using published CMS risk models <sup>1</sup>, or ICD codes for conditions deemed important by clinical expertise or prior literature.

| Condition                                          | Definition |
|----------------------------------------------------|------------|
| Tuberculosis                                       | cc1        |
| Septicemia                                         | cc2        |
| Bacterial infection; unspecified site              | cc3        |
| Mycoses                                            | cc4        |
| HIV infection                                      | cc5        |
| Hepatitis                                          | cc6        |
| Viral infection                                    | cc7        |
| Other infections; including parasitic              | cc8        |
| Sexually transmitted infections                    | cc9        |
| Immunizations and screening for infectious disease | cc10       |
| Cancer of head and neck                            | cc11       |
| Cancer of esophagus                                | cc12       |
| Cancer of stomach                                  | cc13       |
| Cancer of colon                                    | cc14       |
| Cancer of rectum and anus                          | cc15       |
| Cancer of liver and intrahepatic bile duct         | cc16       |
| Cancer of pancreas                                 | cc17       |
| Cancer of other GI organs; peritoneum              | cc18       |
| Cancer of bronchus; lung                           | cc19       |
| Cancer; other respiratory and intrathoracic        | cc20       |
| Cancer of bone and connective tissue               | cc21       |
| Melanomas of skin                                  | cc22       |
| Other non-epithelial cancer of skin                | cc23       |
| Cancer of breast                                   | cc24       |
| Cancer of uterus                                   | cc25       |
| Cancer of cervix                                   | cc26       |
| Cancer of ovary                                    | cc27       |
| Cancer of other female genital organs              | cc28       |
| Cancer of prostate                                 | cc29       |
| Cancer of testis                                   | cc30       |
| Cancer of other male genital organs                | cc31       |
| Cancer of bladder                                  | cc32       |
| Cancer of kidney and renal pelvis                  | cc33       |
| Cancer of other urinary organs                     | cc34       |
| Cancer of brain and nervous system                 | cc35       |
| Cancer of thyroid                                  | cc36       |
| Hodgkin`s disease                                  | cc37       |
| Non-Hodgkin`s lymphoma                             | cc38       |
| Leukemia                                           | cc39       |
| Multiple myeloma                                   | cc40       |
| Cancer; other and unspecified primary              | cc41       |
| Secondary malignancies                             | cc42       |
| Malignant neoplasm without specification of site   | cc43       |

|                                                                                                     |       |
|-----------------------------------------------------------------------------------------------------|-------|
| Neoplasms of unspecified nature or uncertain behavior                                               | cc44  |
| Maintenance chemotherapy; radiotherapy                                                              | cc45  |
| Benign neoplasm of uterus                                                                           | cc46  |
| Other and unspecified benign neoplasm                                                               | cc47  |
| Thyroid disorders                                                                                   | cc48  |
| Diabetes mellitus without complication                                                              | cc49  |
| Diabetes mellitus with complications                                                                | cc50  |
| Other endocrine disorders                                                                           | cc51  |
| Nutritional deficiencies                                                                            | cc52  |
| Disorders of lipid metabolism                                                                       | cc53  |
| Gout and other crystal arthropathies                                                                | cc54  |
| Fluid and electrolyte disorders                                                                     | cc55  |
| Cystic fibrosis                                                                                     | cc56  |
| Immunity disorders                                                                                  | cc57  |
| Other nutritional; endocrine; and metabolic disorders                                               | cc58  |
| Deficiency and other anemia                                                                         | cc59  |
| Acute post-hemorrhagic anemia                                                                       | cc60  |
| Sickle cell anemia                                                                                  | cc61  |
| Coagulation and hemorrhagic disorders                                                               | cc62  |
| Diseases of white blood cells                                                                       | cc63  |
| Other hematologic conditions                                                                        | cc64  |
| Meningitis (except that caused by tuberculosis or sexually transmitted disease)                     | cc76  |
| Encephalitis (except that caused by tuberculosis or sexually transmitted disease)                   | cc77  |
| Other CNS infection and poliomyelitis                                                               | cc78  |
| Parkinson`s disease                                                                                 | cc79  |
| Multiple sclerosis                                                                                  | cc80  |
| Other hereditary and degenerative nervous system conditions                                         | cc81  |
| Paralysis                                                                                           | cc82  |
| Epilepsy; convulsions                                                                               | cc83  |
| Headache; including migraine                                                                        | cc84  |
| Coma; stupor; and brain damage                                                                      | cc85  |
| Cataract                                                                                            | cc86  |
| Retinal detachments; defects; vascular occlusion; and retinopathy                                   | cc87  |
| Glaucoma                                                                                            | cc88  |
| Blindness and vision defects                                                                        | cc89  |
| Inflammation; infection of eye (except that caused by tuberculosis or sexually transmitted disease) | cc90  |
| Other eye disorders                                                                                 | cc91  |
| Otitis media and related conditions                                                                 | cc92  |
| Conditions associated with dizziness or vertigo                                                     | cc93  |
| Other ear and sense organ disorders                                                                 | cc94  |
| Other nervous system disorders                                                                      | cc95  |
| Heart valve disorders                                                                               | cc96  |
| Peri-; endo-; and myocarditis; cardiomyopathy                                                       | cc97  |
| Essential hypertension                                                                              | cc98  |
| Hypertension with complications and secondary hypertension                                          | cc99  |
| Acute myocardial infarction                                                                         | cc100 |

|                                                                                |       |
|--------------------------------------------------------------------------------|-------|
| Coronary atherosclerosis and other heart disease                               | cc101 |
| Nonspecific chest pain                                                         | cc102 |
| Pulmonary heart disease                                                        | cc103 |
| Other and ill-defined heart disease                                            | cc104 |
| Conduction disorders                                                           | cc105 |
| Cardiac dysrhythmias                                                           | cc106 |
| Cardiac arrest and ventricular fibrillation                                    | cc107 |
| Congestive heart failure; non-hypertensive                                     | cc108 |
| Acute cerebrovascular disease                                                  | cc109 |
| Occlusion or stenosis of pre-cerebral arteries                                 | cc110 |
| Other and ill-defined cerebrovascular disease                                  | cc111 |
| Transient cerebral ischemia                                                    | cc112 |
| Late effects of cerebrovascular disease                                        | cc113 |
| Peripheral and visceral atherosclerosis                                        | cc114 |
| Aortic; peripheral; and visceral artery aneurysms                              | cc115 |
| Aortic and peripheral arterial embolism or thrombosis                          | cc116 |
| Other circulatory disease                                                      | cc117 |
| Phlebitis; thrombophlebitis and thromboembolism                                | cc118 |
| Varicose veins of lower extremity                                              | cc119 |
| Hemorrhoids                                                                    | cc120 |
| Other diseases of veins and lymphatics                                         | cc121 |
| Pneumonia (except that caused by tuberculosis or sexually transmitted disease) | cc122 |
| Influenza                                                                      | cc123 |
| Acute and chronic tonsillitis                                                  | cc124 |
| Acute bronchitis                                                               | cc125 |
| Other upper respiratory infections                                             | cc126 |
| Chronic obstructive pulmonary disease and bronchiectasis                       | cc127 |
| Asthma                                                                         | cc128 |
| Aspiration pneumonitis; food/vomitus                                           | cc129 |
| Pleurisy; pneumothorax; pulmonary collapse                                     | cc130 |
| Respiratory failure; insufficiency; arrest (adult)                             | cc131 |
| Lung disease due to external agents                                            | cc132 |
| Other lower respiratory disease                                                | cc133 |
| Other upper respiratory disease                                                | cc134 |
| Intestinal infection                                                           | cc135 |
| Disorders of teeth and jaw                                                     | cc136 |
| Diseases of mouth; excluding dental                                            | cc137 |
| Esophageal disorders                                                           | cc138 |
| Gastroduodenal ulcer (except hemorrhage)                                       | cc139 |
| Gastritis and duodenitis                                                       | cc140 |
| Other disorders of stomach and duodenum                                        | cc141 |
| Appendicitis and other appendiceal conditions                                  | cc142 |
| Abdominal hernia                                                               | cc143 |
| Regional enteritis and ulcerative colitis                                      | cc144 |
| Intestinal obstruction without hernia                                          | cc145 |
| Diverticulosis and diverticulitis                                              | cc146 |
| Anal and rectal conditions                                                     | cc147 |
| Peritonitis and intestinal abscess                                             | cc148 |

|                                                                 |       |
|-----------------------------------------------------------------|-------|
| Biliary tract disease                                           | cc149 |
| Liver disease; alcohol-related                                  | cc150 |
| Other liver diseases                                            | cc151 |
| Pancreatic disorders (not diabetes)                             | cc152 |
| Gastrointestinal hemorrhage                                     | cc153 |
| Noninfectious gastroenteritis                                   | cc154 |
| Other gastrointestinal disorders                                | cc155 |
| Nephritis; nephrosis; renal sclerosis                           | cc156 |
| Acute and unspecified renal failure                             | cc157 |
| Chronic kidney disease                                          | cc158 |
| Urinary tract infections                                        | cc159 |
| Calculus of urinary tract                                       | cc160 |
| Other diseases of kidney and ureters                            | cc161 |
| Other diseases of bladder and urethra                           | cc162 |
| Genitourinary symptoms and ill-defined conditions               | cc163 |
| Hyperplasia of prostate                                         | cc164 |
| Inflammatory conditions of male genital organs                  | cc165 |
| Other male genital disorders                                    | cc166 |
| Nonmalignant breast conditions                                  | cc167 |
| Inflammatory diseases of female pelvic organs                   | cc168 |
| Endometriosis                                                   | cc169 |
| Prolapse of female genital organs                               | cc170 |
| Menstrual disorders                                             | cc171 |
| Ovarian cyst                                                    | cc172 |
| Menopausal disorders                                            | cc173 |
| Skin and subcutaneous tissue infections                         | cc197 |
| Other inflammatory condition of skin                            | cc198 |
| Chronic ulcer of skin                                           | cc199 |
| Other skin disorders                                            | cc200 |
| Infective arthritis and osteomyelitis                           | cc201 |
| Rheumatoid arthritis and related disease                        | cc202 |
| Osteoarthritis                                                  | cc203 |
| Other non-traumatic joint disorders                             | cc204 |
| Spondylosis; intervertebral disc disorders; other back problems | cc205 |
| Osteoporosis                                                    | cc206 |
| Pathological fracture                                           | cc207 |
| Acquired foot deformities                                       | cc208 |
| Other acquired deformities                                      | cc209 |
| Systemic lupus erythematosus and connective tissue disorders    | cc210 |
| Other connective tissue disease                                 | cc211 |
| Other bone disease and musculoskeletal deformities              | cc212 |
| Cardiac and circulatory congenital anomalies                    | cc213 |
| Digestive congenital anomalies                                  | cc214 |
| Genitourinary congenital anomalies                              | cc215 |
| Nervous system congenital anomalies                             | cc216 |
| Other congenital anomalies                                      | cc217 |
| Joint disorders and dislocations; trauma-related                | cc225 |
| Fracture of neck of femur (hip)                                 | cc226 |
| Spinal cord injury                                              | cc227 |

|                                                      |                                                                                                                                                                                                                                                                                                                                                                                                                                                                                                                                                                                                                             |
|------------------------------------------------------|-----------------------------------------------------------------------------------------------------------------------------------------------------------------------------------------------------------------------------------------------------------------------------------------------------------------------------------------------------------------------------------------------------------------------------------------------------------------------------------------------------------------------------------------------------------------------------------------------------------------------------|
| Skull and face fractures                             | cc228                                                                                                                                                                                                                                                                                                                                                                                                                                                                                                                                                                                                                       |
| Fracture of upper limb                               | cc229                                                                                                                                                                                                                                                                                                                                                                                                                                                                                                                                                                                                                       |
| Fracture of lower limb                               | cc230                                                                                                                                                                                                                                                                                                                                                                                                                                                                                                                                                                                                                       |
| Other fractures                                      | cc231                                                                                                                                                                                                                                                                                                                                                                                                                                                                                                                                                                                                                       |
| Sprains and strains                                  | cc232                                                                                                                                                                                                                                                                                                                                                                                                                                                                                                                                                                                                                       |
| Intracranial injury                                  | cc233                                                                                                                                                                                                                                                                                                                                                                                                                                                                                                                                                                                                                       |
| Crushing injury or internal injury                   | cc234                                                                                                                                                                                                                                                                                                                                                                                                                                                                                                                                                                                                                       |
| Open wounds of head; neck; and trunk                 | cc235                                                                                                                                                                                                                                                                                                                                                                                                                                                                                                                                                                                                                       |
| Open wounds of extremities                           | cc236                                                                                                                                                                                                                                                                                                                                                                                                                                                                                                                                                                                                                       |
| Superficial injury; contusion                        | cc239                                                                                                                                                                                                                                                                                                                                                                                                                                                                                                                                                                                                                       |
| Burns                                                | cc240                                                                                                                                                                                                                                                                                                                                                                                                                                                                                                                                                                                                                       |
| Poisoning by psychotropic agents                     | cc241                                                                                                                                                                                                                                                                                                                                                                                                                                                                                                                                                                                                                       |
| Poisoning by other medications and drugs             | cc242                                                                                                                                                                                                                                                                                                                                                                                                                                                                                                                                                                                                                       |
| Poisoning by nonmedicinal substances                 | cc243                                                                                                                                                                                                                                                                                                                                                                                                                                                                                                                                                                                                                       |
| Other injuries and conditions due to external causes | cc244                                                                                                                                                                                                                                                                                                                                                                                                                                                                                                                                                                                                                       |
| Syncope                                              | cc245                                                                                                                                                                                                                                                                                                                                                                                                                                                                                                                                                                                                                       |
| Fever of unknown origin                              | cc246                                                                                                                                                                                                                                                                                                                                                                                                                                                                                                                                                                                                                       |
| Lymphadenitis                                        | cc247                                                                                                                                                                                                                                                                                                                                                                                                                                                                                                                                                                                                                       |
| Gangrene                                             | cc248                                                                                                                                                                                                                                                                                                                                                                                                                                                                                                                                                                                                                       |
| Shock                                                | cc249                                                                                                                                                                                                                                                                                                                                                                                                                                                                                                                                                                                                                       |
| Nausea and vomiting                                  | cc250                                                                                                                                                                                                                                                                                                                                                                                                                                                                                                                                                                                                                       |
| Abdominal pain                                       | cc251                                                                                                                                                                                                                                                                                                                                                                                                                                                                                                                                                                                                                       |
| Malaise and fatigue                                  | cc252                                                                                                                                                                                                                                                                                                                                                                                                                                                                                                                                                                                                                       |
| Allergic reactions                                   | cc253                                                                                                                                                                                                                                                                                                                                                                                                                                                                                                                                                                                                                       |
| Prior pacemaker                                      | V4501, Z950, Z4501, 0JH606Z, 02H63JZ, 02HK3JZ, 3783, 3772                                                                                                                                                                                                                                                                                                                                                                                                                                                                                                                                                                   |
| Prior intra-cardiac defibrillator                    | 0JH608Z, 02H63KZ, 02HK3KZ, 3794, V4502, Z95810, Z4502                                                                                                                                                                                                                                                                                                                                                                                                                                                                                                                                                                       |
| Prior percutaneous coronary intervention             | 0066, 1755, 3601, 3602, 3603, 3605, 3603, 3607, 3609, 0250047, 027004Z, 02700D6, 02700DZ, 02700T6, 02500TZ, 02700Z6, 02700ZZ, 0270346, 027034Z, 02703D6, 02703DZ, 02703T6, 02703TZ, 02703Z6, 02703TZ, 02703Z6, 02703ZZ, 0270446, 027044Z, 02704D6, 02704DZ, 02407TZ, 02404Z6, 02404ZZ, 0271046, 027104Z, 02710D6, 02710DZ, 02710T6, 02710Z6, 02710ZZ, 0271346, 027134Z, 02713D6, 02713DZ, 02713T6, 02713TZ, 02713Z6, 02713ZZ, 0271446, 027144Z, 02714D6, 02714DZ, 02714T6, 02714TZ, 02714Z6, 02714ZZ, 0272046, 027204Z, 02720D6, 02020DZ, 02720T6, 02720TZ, 02720Z6, 02720ZZ, 0272346, 027234Z, 72723D6', 02723DZ, 02723T6, |

|                                               |                                                                                                                                                                                                                                                                                                                                                             |
|-----------------------------------------------|-------------------------------------------------------------------------------------------------------------------------------------------------------------------------------------------------------------------------------------------------------------------------------------------------------------------------------------------------------------|
|                                               | 02723TZ , 02723Z6, 02723ZZ,<br>0272446, 027244Z, 02724D6,<br>02724DZ, 02724T6, 02724TZ,<br>02724Z6, 02724ZZ, 0273046,<br>027304Z, 02730D6, 02730DZ,<br>02730T6, 02730TZ, 02730Z6,<br>02730ZZ, 0273346, 027334Z,<br>02433D6, 02733DZ, 02733T6,<br>02733TZ, 02733Z6, 02733ZZ,<br>0273446, 027344Z, 02734D6,<br>02734DZ, 02734T6, 02734TZ,<br>02734Z6, 02734ZZ |
| Prior coronary artery bypass grafting surgery | 02100*, 02110*, 02120*, 02130*,<br>3611, 3612, 3613, 3614 , 3615,<br>3616                                                                                                                                                                                                                                                                                   |
| Decubitus ulcer                               | L89*, 70700, 70701, 70702,<br>70703, 70704, 70705, 70706,<br>70707, 70709 , 70720, 70721,<br>70722, 70723, 70724, 70725                                                                                                                                                                                                                                     |
| Delirium                                      | F05*, 2930, 2931                                                                                                                                                                                                                                                                                                                                            |
| Dysphagia                                     | R13*, 78720, 78721, 78722,<br>78723, 78724, 78729                                                                                                                                                                                                                                                                                                           |
| Hypotension                                   | I95*, 4580, 4581, 45821, 45829,<br>4588, 4589                                                                                                                                                                                                                                                                                                               |
| Urinary incontinence                          | R32*, 78830                                                                                                                                                                                                                                                                                                                                                 |
| Urinary retention                             | R33*, 78820, 78829                                                                                                                                                                                                                                                                                                                                          |
| Alzheimer's disease                           | G81* , 34200, 34201, 34202,<br>34210, 34211, 34212, 34280,<br>34281, 34282, 34290, 34291,<br>34292                                                                                                                                                                                                                                                          |
| Falls                                         | W19*, W06*, W10*, W01*,<br>W18*, E8889, E9293, E8844,<br>E9293, E8800, E8801, E8809,<br>E9293, E8859, E8880, E8881,<br>E9293, E8846, E8859, E8880,<br>E8881, E8888, E9178, E9293                                                                                                                                                                            |
| Abnormal gait                                 | R26*, 7197, 7812                                                                                                                                                                                                                                                                                                                                            |
| Pneumonitis due to solid and liquids          | J69*, 5070, 5071, 5078                                                                                                                                                                                                                                                                                                                                      |
| Unspecified Dementia                          | F03*, 2900, 29010, 29011, 29013,<br>29021, 2908, 2909, 29420, 29421                                                                                                                                                                                                                                                                                         |
| Vascular dementia                             | F01*, 29040, 29041                                                                                                                                                                                                                                                                                                                                          |

1: <https://www.cms.gov/Medicare/Health-Plans/MedicareAdvtgSpecRateStats/Risk-Adjustors.html>

**Supplemental Table 2:** Final variables included in the risk adjustment model for 30-day home time in the whole study cohort. These are variables that were significant at a level of  $P < 0.01$  in at least 80% of the 100 models done on bootstrapped samples in the training/derivation data set. Models were performed as generalized linear mixed models with a random intercept for the TAVR hospital. All chronic conditions (CC) are defined by mapping international classification of diseases (ICD) codes 9 and 10 to each chronic condition using published CMS risk models.<sup>1</sup>

| Definition used to define the variable | Variable                                                                       | Parameter Estimate | Standard error | P value |
|----------------------------------------|--------------------------------------------------------------------------------|--------------------|----------------|---------|
|                                        | Age                                                                            | -0.0048            | 7.1E-05        | <0.001  |
|                                        | Male sex                                                                       | 0.03848            | 0.00108        | <0.001  |
| cc103                                  | Pulmonary heart disease                                                        | -0.0092            | 0.00117        | <0.001  |
| cc104                                  | Other and ill-defined heart disease                                            | -0.0248            | 0.00306        | <0.001  |
| cc105                                  | Conduction disorders                                                           | -0.0208            | 0.00101        | <0.001  |
| cc106                                  | Cardiac dysrhythmias                                                           | -0.033             | 0.00099        | <0.001  |
| cc107                                  | Cardiac arrest and ventricular fibrillation                                    | -0.3293            | 0.00429        | <0.001  |
| cc108                                  | Congestive heart failure; non-hypertensive                                     | -0.0183            | 0.00121        | <0.001  |
| cc109                                  | Acute cerebrovascular disease                                                  | -0.2833            | 0.00303        | <0.001  |
| cc114                                  | Peripheral and visceral atherosclerosis                                        | -0.023             | 0.00119        | <0.001  |
| cc115                                  | Aortic; peripheral; and visceral artery aneurysms                              | -0.0487            | 0.00182        | <0.001  |
| cc116                                  | Aortic and peripheral arterial embolism or thrombosis                          | -0.1576            | 0.00507        | <0.001  |
| cc117                                  | Other circulatory disease                                                      | 0.00757            | 0.00122        | <0.001  |
| cc118                                  | Phlebitis; thrombophlebitis and thromboembolism                                | -0.0233            | 0.00198        | <0.001  |
| cc121                                  | Other diseases of veins and lymphatics                                         | -0.0182            | 0.00267        | <0.001  |
| cc122                                  | Pneumonia (except that caused by tuberculosis or sexually transmitted disease) | -0.0153            | 0.00197        | <0.001  |
| cc127                                  | Chronic obstructive pulmonary disease and bronchiectasis                       | -0.0122            | 0.00115        | <0.001  |
| cc129                                  | Aspiration pneumonitis; food/vomitus                                           | -0.122             | 0.00474        | <0.001  |
| cc130                                  | Pleurisy; pneumothorax; pulmonary collapse                                     | -0.1058            | 0.00182        | <0.001  |
| cc131                                  | Respiratory failure; insufficiency; arrest (adult)                             | -0.0727            | 0.0015         | <0.001  |
| cc135                                  | Intestinal infection                                                           | -0.0558            | 0.00529        | <0.001  |
| cc139                                  | Gastroduodenal ulcer (except hemorrhage)                                       | 0.02024            | 0.00273        | <0.001  |
| cc145                                  | Intestinal obstruction without hernia                                          | -0.0555            | 0.00454        | <0.001  |
| cc146                                  | Diverticulosis and diverticulitis                                              | 0.0298             | 0.00226        | <0.001  |
| cc151                                  | Other liver diseases                                                           | -0.0186            | 0.00214        | <0.001  |
| cc153                                  | Gastrointestinal hemorrhage                                                    | -0.0182            | 0.00255        | <0.001  |
| cc155                                  | Other gastrointestinal disorders                                               | -0.0302            | 0.0015         | <0.001  |
| cc156                                  | Nephritis; nephrosis; renal sclerosis                                          | -0.0582            | 0.00481        | <0.001  |
| cc157                                  | Acute and unspecified renal failure                                            | -0.1016            | 0.00151        | <0.001  |
| cc158                                  | Chronic kidney disease                                                         | -0.0087            | 0.00109        | <0.001  |
| cc159                                  | Urinary tract infections                                                       | -0.0601            | 0.00177        | <0.001  |
| cc160                                  | Calculus of urinary tract                                                      | 0.03062            | 0.00294        | <0.001  |
| cc163                                  | Genitourinary symptoms and ill-defined conditions                              | -0.0217            | 0.00192        | <0.001  |



|           |                                                      |         |         |        |
|-----------|------------------------------------------------------|---------|---------|--------|
| cc164     | Hyperplasia of prostate                              | 0.01314 | 0.00143 | <0.001 |
| cc165     | Inflammatory conditions of male genital organs       | 0.06011 | 0.01102 | <0.001 |
| cc173     | Menopausal disorders                                 | 0.05863 | 0.00416 | <0.001 |
| cc197     | Skin and subcutaneous tissue infections              | -0.0435 | 0.00325 | <0.001 |
| cc199     | Chronic ulcer of skin                                | -0.0747 | 0.00341 | <0.001 |
| cc201     | Infective arthritis and osteomyelitis                | 0.07004 | 0.00702 | <0.001 |
| cc204     | Other non-traumatic joint disorders                  | -0.0441 | 0.00265 | <0.001 |
| cc209     | Other acquired deformities                           | -0.0279 | 0.00393 | <0.001 |
| cc23      | Other non-epithelial cancer of skin                  | 0.01958 | 0.00197 | <0.001 |
| cc233     | Intracranial injury                                  | 0.03494 | 0.00579 | <0.001 |
| cc234     | Crushing injury or internal injury                   | -0.0985 | 0.00658 | <0.001 |
| cc239     | Superficial injury; contusion                        | -0.024  | 0.00356 | <0.001 |
| cc244     | Other injuries and conditions due to external causes | -0.0475 | 0.00225 | <0.001 |
| cc248     | Gangrene                                             | -0.0814 | 0.01319 | <0.001 |
| cc249     | Shock                                                | -0.23   | 0.00305 | <0.001 |
| cc253     | Allergic reactions                                   | 0.02253 | 0.0012  | <0.001 |
| ICD codes | Prior ICD                                            | 0.05637 | 0.00384 | <0.001 |
| ICD codes | Prior pacemaker                                      | 0.06475 | 0.0021  | <0.001 |
| ICD codes | Dementia                                             | -0.0476 | 0.00227 | <0.001 |
| ICD codes | Delirium                                             | -0.0516 | 0.00134 | <0.001 |
| ICD codes | Abnormal gait                                        | -0.0141 | 0.0009  | <0.001 |
| ICD codes | Dysphagia                                            | -0.0979 | 0.00408 | <0.001 |
| ICD codes | Hypotension                                          | -0.0298 | 0.00106 | <0.001 |
| ICD codes | Prior PCI                                            | 0.01612 | 0.00107 | <0.001 |
| ICD codes | Urinary retention                                    | -0.0225 | 0.00202 | <0.001 |
| ICD codes | Volume depletion                                     | 0.01751 | 0.00094 | <0.001 |

1: <https://www.cms.gov/Medicare/Health-Plans/MedicareAdvtgSpecRateStats/Risk-Adjustors.html>

**Supplemental Table 3:** Final variables included in the risk adjustment model for 30-day mortality in the whole study cohort. These are variables that were significant at a level of  $P < 0.01$  in at least 80% of the 100 models done on bootstrapped samples in the training/derivation data set. Models were performed as mixed effect hierarchical logistic regression with a random intercept for the TAVR hospital. All chronic conditions (CC) are defined by mapping international classification of diseases (ICD) codes 9 and 10 to each chronic condition using published CMS risk models.<sup>1</sup>

| Definition used to define the variable | Parameter                                             | Estimate | Standard error | P value |
|----------------------------------------|-------------------------------------------------------|----------|----------------|---------|
|                                        | Age                                                   | 0.04693  | 0.00244        | <0.001  |
| cc10                                   | Immunizations and screening for infectious disease    | -0.2736  | 0.07641        | <0.001  |
| cc105                                  | Conduction disorders                                  | -0.2603  | 0.03328        | <0.001  |
| cc106                                  | Cardiac dysrhythmias                                  | 0.1716   | 0.03604        | <0.001  |
| cc107                                  | Cardiac arrest and ventricular fibrillation           | 1.9853   | 0.04837        | <0.001  |
| cc109                                  | Acute cerebrovascular disease                         | 0.9818   | 0.05621        | <0.001  |
| cc113                                  | Late effects of cerebrovascular disease               | -0.438   | 0.08854        | <0.001  |
| cc114                                  | Peripheral and visceral atherosclerosis               | 0.1928   | 0.03587        | <0.001  |
| cc115                                  | Aortic; peripheral; and visceral artery aneurysms     | 0.5108   | 0.04636        | <0.001  |
| cc116                                  | Aortic and peripheral arterial embolism or thrombosis | 0.5351   | 0.09271        | <0.001  |
| cc130                                  | Pleurisy; pneumothorax; pulmonary collapse            | 0.2629   | 0.04097        | <0.001  |
| cc131                                  | Respiratory failure; insufficiency; arrest (adult)    | 0.7582   | 0.03673        | <0.001  |
| cc151                                  | Other liver diseases                                  | 0.4011   | 0.04912        | <0.001  |
| cc157                                  | Acute and unspecified renal failure                   | 0.6106   | 0.03654        | <0.001  |
| cc249                                  | Shock                                                 | 1.2915   | 0.04302        | <0.001  |
| ICD codes                              | Hypotension                                           | 0.1876   | 0.02388        | <0.001  |

1: <https://www.cms.gov/Medicare/Health-Plans/MedicareAdvtgSpecRateStats/Risk-Adjustors.html>

**Supplemental Table 4:** Final variables included in the risk adjustment model for 30-day readmission in the whole study cohort. These are variables that were significant at a level of  $P < 0.01$  in at least 80% of the 100 models done on bootstrapped samples in the training/derivation data set. Models were performed as mixed effect hierarchical logistic regression with a random intercept for the TAVR hospital. All chronic conditions (CC) are defined by mapping international classification of diseases (ICD) codes 9 and 10 to each chronic condition using published CMS risk models.<sup>1</sup>

| Definition used to define the variable | Parameter                                                | Parameter Estimate | Standard error | P value |
|----------------------------------------|----------------------------------------------------------|--------------------|----------------|---------|
|                                        | Age                                                      | 0.01823            | 0.00104        | <.0001  |
|                                        | Male sex                                                 | -0.0699            | 0.01417        | <.0001  |
| cc102                                  | Nonspecific chest pain                                   | 0.1504             | 0.0372         | <.0001  |
| cc103                                  | Pulmonary heart disease                                  | 0.09747            | 0.01552        | <.0001  |
| cc106                                  | Cardiac dysrhythmias                                     | 0.2532             | 0.01449        | <.0001  |
| cc108                                  | Congestive heart failure                                 | 0.1374             | 0.01855        | <.0001  |
| cc109                                  | Acute cerebrovascular disease                            | 0.6482             | 0.0293         | <.0001  |
| cc114                                  | Peripheral and visceral atherosclerosis                  | 0.123              | 0.01585        | <.0001  |
| cc115                                  | Aortic; peripheral; and visceral artery aneurysms        | 0.1506             | 0.02328        | <.0001  |
| cc116                                  | Aortic and peripheral arterial embolism or thrombosis    | 0.3515             | 0.05307        | <.0001  |
| cc118                                  | Phlebitis; thrombophlebitis and thromboembolism          | 0.1053             | 0.02465        | <.0001  |
| cc127                                  | Chronic obstructive pulmonary disease and bronchiectasis | 0.1946             | 0.01542        | <.0001  |
| cc130                                  | Pleurisy; pneumothorax; pulmonary collapse               | 0.2493             | 0.02037        | <.0001  |
| cc131                                  | Respiratory failure; insufficiency; arrest (adult)       | 0.2218             | 0.0176         | <.0001  |
| cc153                                  | Gastrointestinal hemorrhage                              | 0.1908             | 0.02772        | <.0001  |
| cc155                                  | Other gastrointestinal disorders                         | 0.1611             | 0.0171         | <.0001  |
| cc157                                  | Acute and unspecified renal failure                      | 0.342              | 0.01774        | <.0001  |
| cc158                                  | Chronic kidney disease                                   | 0.1457             | 0.01542        | <.0001  |
| cc159                                  | Urinary tract infections                                 | 0.144              | 0.02012        | <.0001  |
| cc199                                  | Chronic ulcer of skin                                    | 0.207              | 0.03341        | <.0001  |
| ICD codes                              | Delirium                                                 | 0.09228            | 0.01349        | <.0001  |
| ICD codes                              | Prior Pacemaker                                          | -0.1001            | 0.02582        | 0.0001  |
| ICD codes                              | Sleep apnea                                              | 0.1213             | 0.01788        | <.0001  |
| ICD codes                              | Urinary Retention                                        | 0.1741             | 0.01849        | <.0001  |

1: <https://www.cms.gov/Medicare/Health-Plans/MedicareAdvtgSpecRateStats/Risk-Adjustors.html>

**Supplemental Table 5:** Performance of the risk adjustment models for different hospital-level performance metrics for Transcatheter aortic valve replacement hospitalization in the development and validation cohort

|                    | Parameter      | Derivation cohort | Validation cohort |
|--------------------|----------------|-------------------|-------------------|
| 30-day home time   | R <sup>2</sup> | 0.216             | 0.214             |
| 30-day mortality   | C-statistics   | 0.82              | 0.82              |
| 30-day readmission | C-statistics   | 0.66              | 0.65              |

Journal Pre-proof

**Supplemental Table 6:** Hospital-level outcomes across hospital groups stratified unadjusted 30-day home time among patients undergoing TAVR

| Variable                                                                  | Low Performing → High Performing |                       |                       |                       | P Value |
|---------------------------------------------------------------------------|----------------------------------|-----------------------|-----------------------|-----------------------|---------|
|                                                                           | Quartile 1<br>(N=163)            | Quartile 2<br>(N=163) | Quartile 3<br>(N=163) | Quartile 4<br>(N=163) |         |
| Length of hospital stay<br>day after TAVR procedure<br>Median (IQR), days | 2.60<br>(2.3-3.0)                | 2.16<br>(1.9-2.4)     | 1.83<br>(1.7-2.0)     | 1.50<br>(1.3-1.7)     | <0.001  |
| 30-day home time<br>Median (IQR), days                                    | 24.2<br>(23.4-24.6)              | 25.5<br>(25.2-25.7)   | 26.4<br>(26.2-26.7)   | 27.6<br>(27.0-28.1)   | <0.001  |
| 30-RSRR<br>Median (IQR) (%)                                               | 14.8<br>(11.4-20.1)              | 13.6<br>(10.6-17.7)   | 12.8<br>(9.2-15.8)    | 9.3<br>(6.8-12.4)     | <0.001  |
| 30-RSMR<br>Median (IQR) (%)                                               | 2.6<br>(1.6-4.0)                 | 2.1<br>(1.1-3.1)      | 1.7<br>(1.0-2.7)      | 0.7<br>(0.0-1.7)      | <0.001  |
| Annual TAVR Volume<br>median (IQR)                                        | 57<br>(35-102)                   | 66<br>(38-98)         | 65<br>(42-107)        | 38<br>(24-62)         | 0.05    |

IQR: Inter quartile range; TAVR: Transcatheter aortic valve replacement; RSRR: Risk-adjusted readmission rate; RSMR: Risk-adjusted mortality rate

**Supplemental Figure 1:** Flow chart of the study cohort selection.

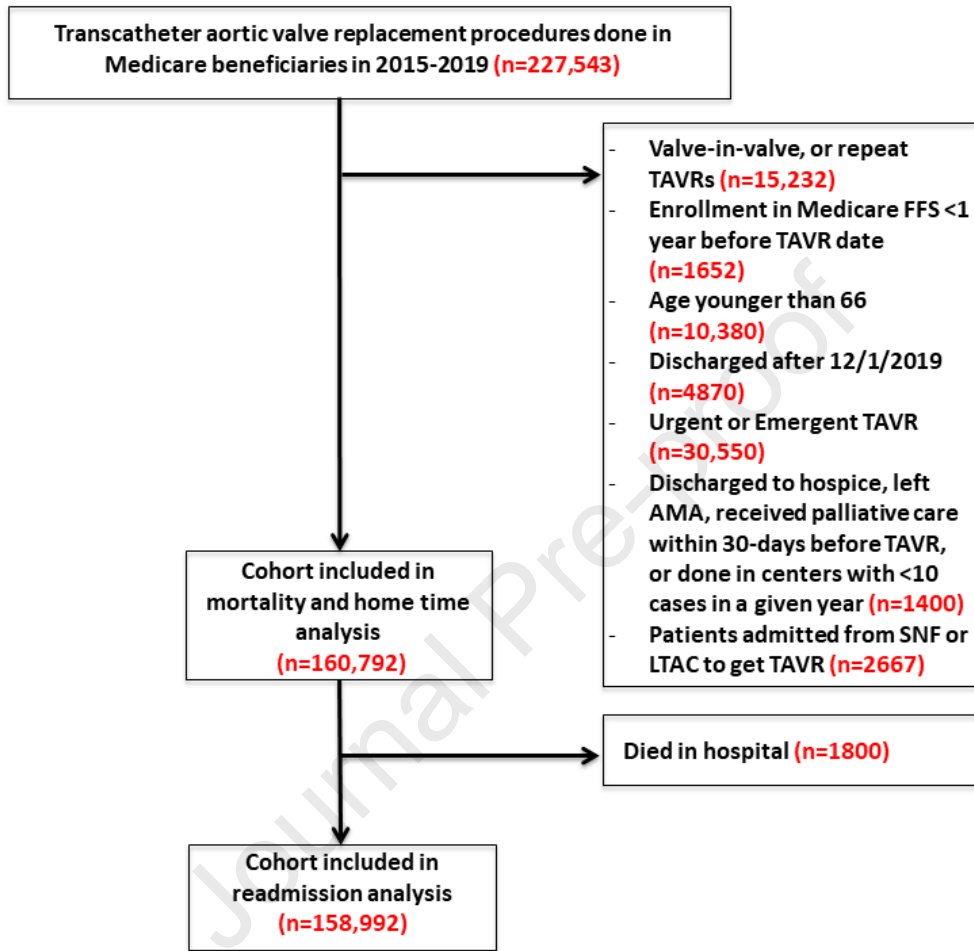

**Supplemental Figure 2:** Histogram of TAVR annual volume: Frequency distribution of average annual TAVR procedure volume for TAVR centers included in the study

## Distribution of annual hospital TAVR volume

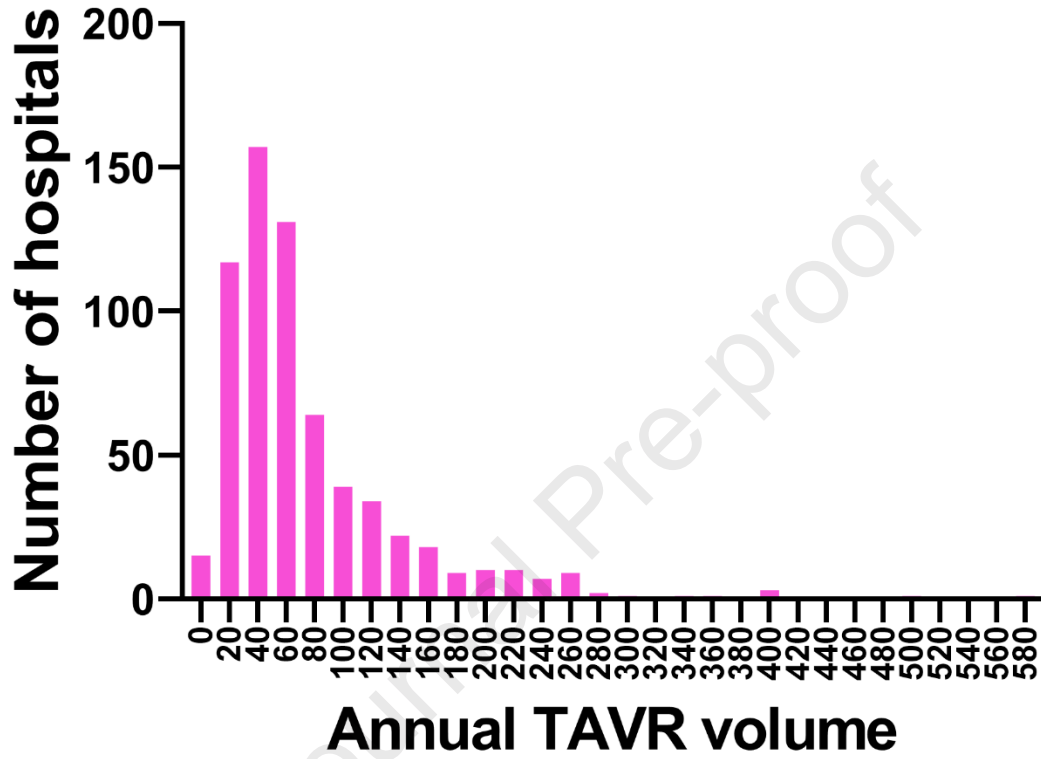

**Supplemental Figure 3:** Correlation between hospital TAVR volume and other hospital quality metrics. Correlation between TAVR center annual volume and a) 30-day RSMR, b) 30-day RSRR

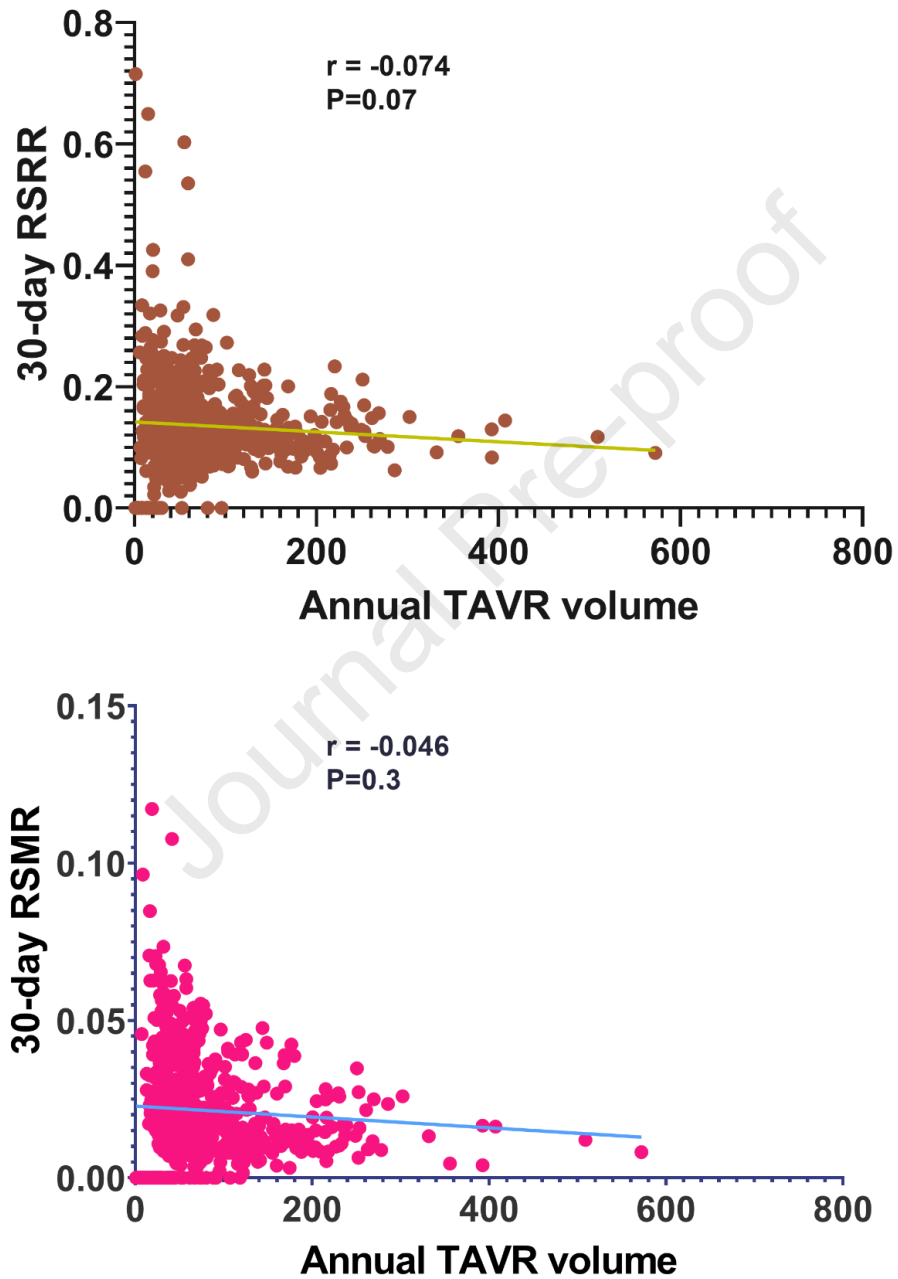



**Supplemental Figure 4:** Correlation between 30-day home time and admissions over one year. Correlation between hospital risk adjusted 30-day home time and rate of admissions per patient-month time for 1 year. Cohort of patients who were discharged from TAVR hospitalization before 1/1/2019 (N=113,978 patients in 599 centers)

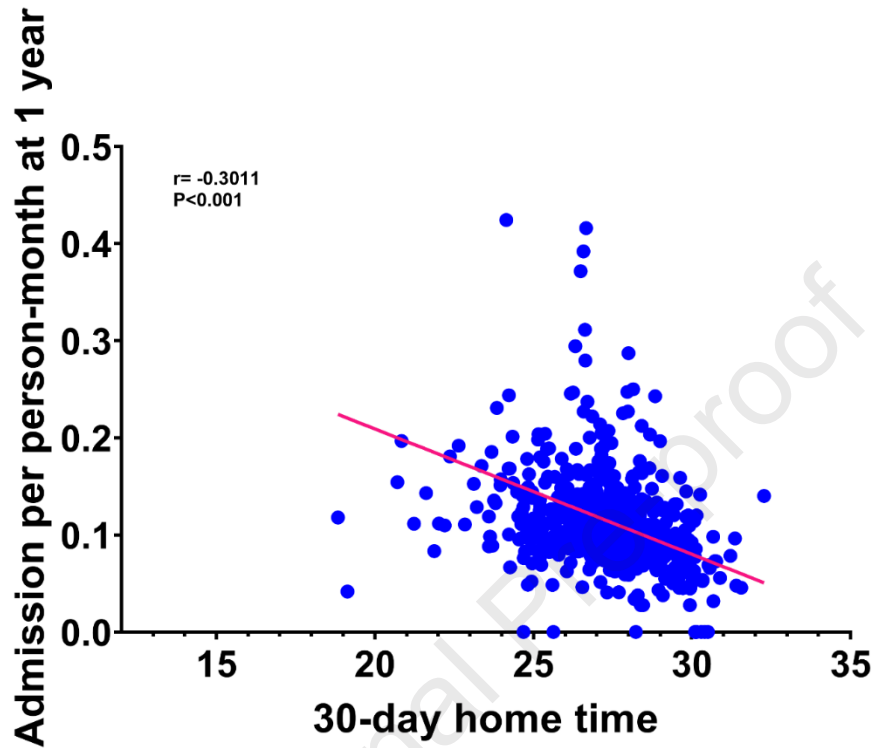

Supplement: NIHMS1758715-supplement-1.pdf [file NIHMS1758715-supplement-1.pdf]
